# Supplementary material for: Neutrophil extracellular traps amplify neutrophil recruitment and inflammation in neutrophilic asthma by stimulating the airway epithelial cells to activate the TLR4/ NF-κB pathway and secrete chemokines
Source: publisher site journal article supplement (doi:10.18632/aging.103479), 2020-08-05
Supplement: Supplementary file [file aging-v12i17-103479-supplementary-material-SD1.pdf]

## SUPPLEMENTARY FIGURE

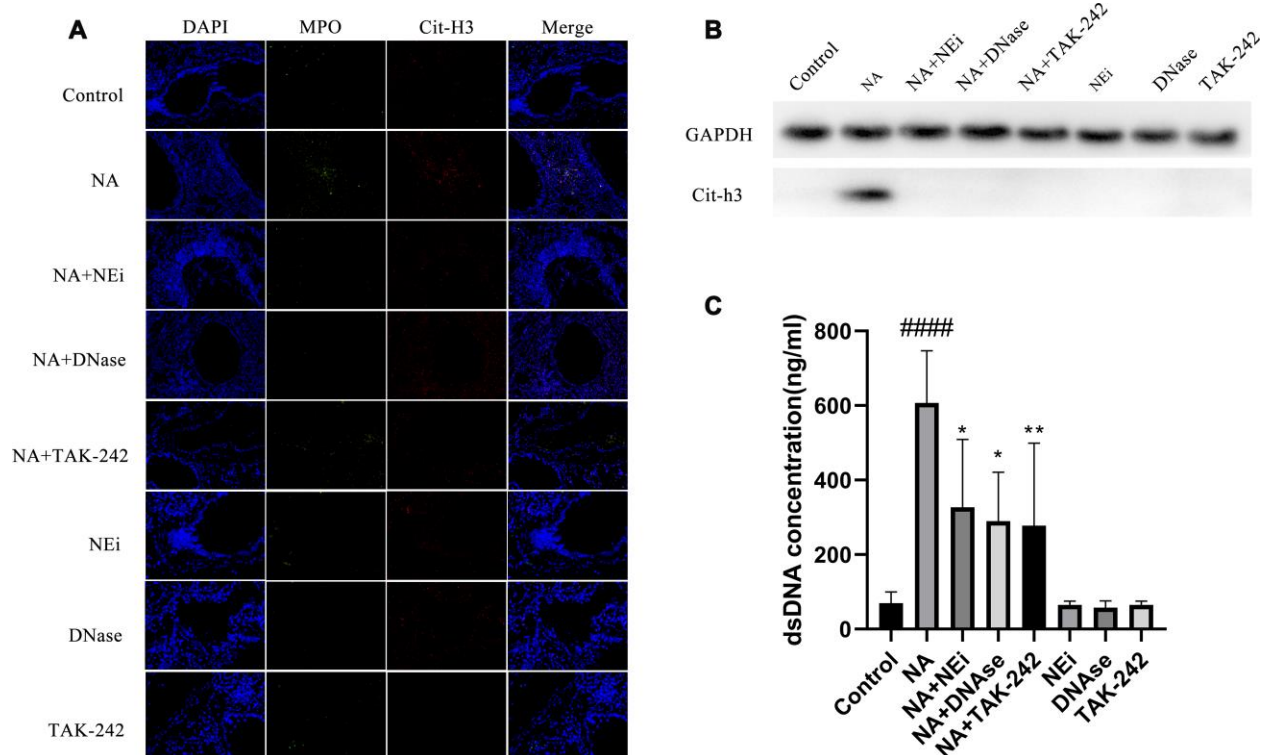

**Supplementary Figure 1. NETs were detected in NA mice and could be removed by NE inhibition, DNase I degeneration, and TLR4 blocking.** (A–C) Assessment of NETs by immunofluorescence, western blot, and PicoGreen. (A) DNA was stained by DAPI (blue), MPO and Cit-H3 were labeled by fluorescent secondary antibodies (red and green); pictures were captured at 200X. (B) Western blot analysis of Cit-H3. (C) BALF dsDNA concentration detected by PicoGreen analysis. NET generation was detected in NA mice, and could be blocked by NEi, DNase I, and TAK-242 administration. ####:  $P < 0.0001$  vs control group. \*:  $P < 0.05$ , \*\*:  $P < 0.01$  vs NA group.
